# Supplementary material for: Development of an international standard set of patient-centred outcome measures for overall paediatric health: a consensus process
Source: HighWire-hosted journal article supplement (doi:10.1136/archdischild-2020-320345), 2020-12-11
Supplement: archdischild-2020-320345supp001_data_supplement.pdf [file archdischild-2020-320345supp001_data_supplement.pdf]

## SUPPLEMENTARY MATERIAL

## Content

|                                                                                                                                                                                     |    |
|-------------------------------------------------------------------------------------------------------------------------------------------------------------------------------------|----|
| eTable 1. Overview of Working Group members. ....                                                                                                                                   | 2  |
| eFigure 1. Overall Pediatric Health Standard Set development process overview. ....                                                                                                 | 4  |
| eFigure 2: Geographic overview of the scanned clinical trials, N=4345 .....                                                                                                         | 5  |
| eTable 2. Search Strategy .....                                                                                                                                                     | 6  |
| eTable 3. Example of health outcomes identified by categorizing the extracted measures in accordance to the phenomenon/topic/ health outcome that they were considered to measure.7 | 7  |
| eFigure 3. The model and framework of the International Classification of Functioning, Disability and Health (ICF, World Health Organization (WHO), 2001). ....                     | 8  |
| eTable 4. Overview of the identified health and health-related outcomes regarding ICF Body Functions stratified by respective resource. ....                                        | 9  |
| eTable 5. Overview of the frequency of identified health and health-related outcomes regarding Activities & Participation stratified by respective resource. ....                   | 10 |
| eTable 6. Overview of the frequency of identified factors influencing health and health-related outcomes regarding Environmental factors stratified by respective resource .....    | 11 |
| eTable 7. Overview of the frequency of identified health and health-related outcomes stratified by respective resource .....                                                        | 12 |
| eTable 8. ICHOM's tool selection criteria. ....                                                                                                                                     | 13 |
| eTable 9. Example of systematic evaluation of identified measures and tools in accordance with ICHOM criteria .....                                                                 | 14 |
| eTable 10. Example of the content-mapping of the measures to the agreed upon OPH outcomes. ....                                                                                     | 15 |
| eTable 11. Example of tool package 1 for age-range birth to 5 years .....                                                                                                           | 16 |
| eTable 12. Example of tool package 2 for age-range birth to 5 years .....                                                                                                           | 16 |
| eTable 13. Overview of the identified case-mix variables following the search for outcome measures. ....                                                                            | 17 |
| eTable 14. Sampling strategy for patient validation survey. ....                                                                                                                    | 18 |
| eTable 15. Overview of Patient Validation Survey respondent characteristics, N=270 .....                                                                                            | 19 |
| eTable 16. Overview of characteristics of the healthcare providers that participated in the professionals open review, N=51 .....                                                   | 20 |

eTable 1. Overview of Working Group members.

| Name                                   | Title(s)                                                                                                       | Country       | Income Level* | Organization                                                                                                    |
|----------------------------------------|----------------------------------------------------------------------------------------------------------------|---------------|---------------|-----------------------------------------------------------------------------------------------------------------|
| Matthew O'Meara, MD                    | NSW Chief Paediatrician; Senior Staff Specialist Paediatric Emergency                                          | Australia     | High          | NSW Health                                                                                                      |
| Michael Morris                         | Founder of Samuel Morris Foundation; WG Patient Advisor                                                        | Australia     | High          | Samuel Morris Foundation                                                                                        |
| Aida Luiza R. Turquetto, PhD           | Physiotherapy and Occupational Therapist of Cardiovascular Surgery Dept - Pediatric Unit                       | Brazil        | Upper Middle  | Heart Institute, University of Sao Paulo Medical School                                                         |
| Luiz F. Caneo, MD, PhD                 | Affiliate Professor of Cardiovascular Surgery Dept. - Pediatric Unit                                           | Brazil        | Upper Middle  | Heart Institute, University of Sao Paulo Medical School                                                         |
| Anne F. Klassen, DPhil                 | Professor of Pediatrics                                                                                        | Canada        | High          | McMaster University                                                                                             |
| Emma J. Mew, MPH                       | Clinical Research Project Manager                                                                              | Canada        | High          | Child Health Evaluative Sciences, Peter Gilgan Center for Research and Learning, The Hospital for Sick Children |
| Martin Offringa, MD, PhD               | Neonatologist; Professor of Paediatrics; Senior Scientist                                                      | Canada        | High          | Department of Paediatrics, The Hospital for Sick Children, University of Toronto                                |
| Nancy J. Butcher, PhD, MSc             | Senior Research Associate                                                                                      | Canada        | High          | The Hospital for Sick Children Research Institute, University of Toronto                                        |
| Catalina Valencia Mayer, SLP, MSPH     | Speech and Language Therapist; Assistant Professor of Health Research and Public Health                        | Colombia      | Upper Middle  | Fundación CINDA                                                                                                 |
| Jaime A. Cespedes L., MD               | Professor of Pediatrics; Head of the Pediatric Hospital and Postgraduate Pediatric Program.                    | Colombia      | Upper Middle  | Fundación Cardioinfantil - Instituto de Cardiología. Universidad del Rosario.                                   |
| Kathleen McGreevy, MBA, PhD            | Coordinator, Office of International Relations and the Promotion of Innovation                                 | Italy         | High          | Meyer Children's Hospital                                                                                       |
| Klaus Peter Biermann, RN-MSN           | Infection Control Nurse                                                                                        | Italy         | High          | Meyer Children's Hospital                                                                                       |
| Naira Pereyra, MD                      | Associate Professor of Pediatric Ophthalmology                                                                 | Mexico        | Upper Middle  | PREVer Kids                                                                                                     |
| Jan A. Hazelzet, MD, PhD               | Chief Medical Officer; Associate Professor of Pediatrics                                                       | Netherlands   | High          | Erasmus University Medical Center                                                                               |
| Salman Kirmani, MBBS, MD               | Associate Professor of Department of Paediatrics and Child Health                                              | Pakistan      | Lower Middle  | Aga Khan University                                                                                             |
| Ng Kee Chong, MBBS, MMed (Paeds), FAMS | Senior Consultant in Children's Emergency Medicine; Medical Board Chairman; Expertise in public health systems | Singapore     | High          | KK Women's and Children's Hospital                                                                              |
| Carlos Rodrigo, MD, PhD                | Chief Clinical Officer and Professor of Pediatrics; Head of Pediatrics                                         | Spain         | High          | Germans Trias i Pujol University Hospital and Universitat Autònoma de Barcelona                                 |
| Juan José García-García, MD, PhD       | Chief of General Pediatrics                                                                                    | Spain         | High          | Hospital Sant Joan de Déu Barcelona, Spain and Universitat de Barcelona                                         |
| John E. Chaplin, AFBPsS C.Psychol, PhD | Associate Professor of Experimental Pediatrics                                                                 | Sweden        | High          | Sahlgrenska Academy at Gothenburg University, Institute of Clinical Sciences, Department of Pediatrics          |
| Albie Alvarez-Cote                     | Founding Member of Milagros para Niños; WG Patient Advisor                                                     | United States | High          | Milagros para Niños - Boston Children's Hospital                                                                |
| James M. Papp, MSW                     | Principal                                                                                                      | United States | High          | Mindful Metrics LLC                                                                                             |

|                                 |                                                                                                                                                   |               |      |                                                    |
|---------------------------------|---------------------------------------------------------------------------------------------------------------------------------------------------|---------------|------|----------------------------------------------------|
| Kathy J. Jenkins, MD, MPH       | Professor of Pediatrics; Pediatric Cardiologist; Executive Director of Center for Applied Pediatric Quality Analytics; Chair of the Working Group | United States | High | Harvard Medical School; Boston Children's Hospital |
| Timothy L. Switaj, MD, MBA, MHA | Primary Care Leadership; Quality Improvement                                                                                                      | United States | High | U.S. Army                                          |

\*as defined by the World Bank Group, April 2020 (<https://data.worldbank.org/income-level/>)

WG members were recruited in a two-step process. First, sponsorship opportunities were presented to children’s hospitals. Then, the confirmed sponsors were asked to nominate WG members. Additionally, ICHOM recruited volunteers to expand the WG and enable broad representation of experience and geography. Recruitment included participants from low-income countries, however, these participants faced challenges, including unaffordable technology and lack of internet connectivity which ultimately precluded them from participating.

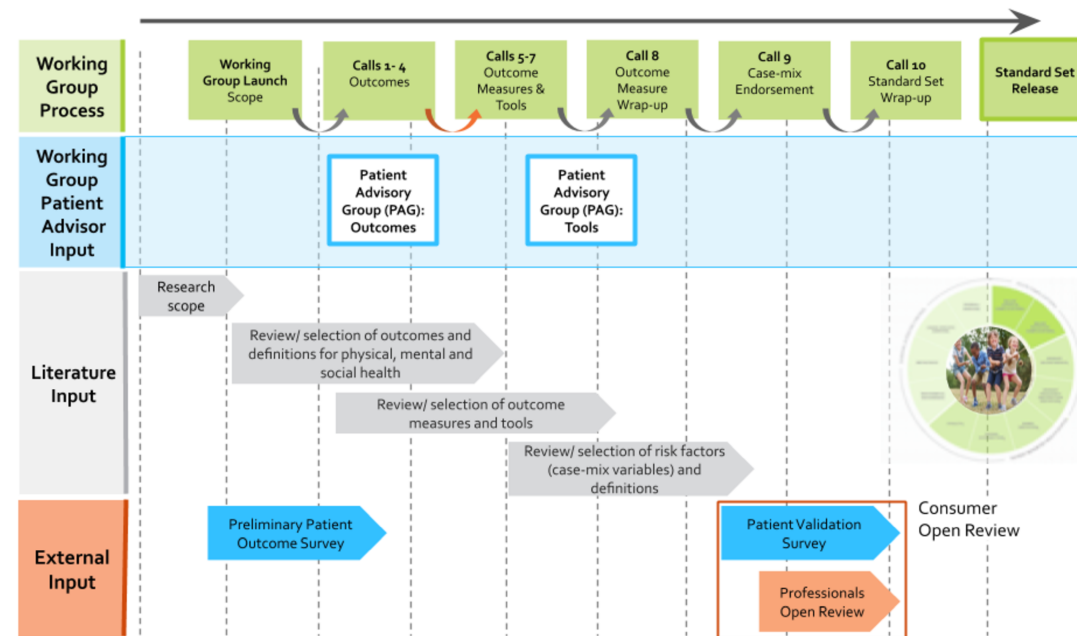

eFigure 1. Overall Pediatric Health Standard Set development process overview.

Between each call a survey was sent out to the Working Group, grey arrows indicate single round survey, orange arrow indicate a modified Delphi process. The PAG was hold with two patient advisors who lead patient advocacy foundations.

WG members were asked to rank outcomes using a 9-point Likert Scale via an electronic survey (Qualtrics Online Survey Platform was used for *all* electronic surveys in this consensus process), with the opportunity to give additional free text feedback.

The voting results of the first round and respondents' comments were anonymized and published for the WG members before voting in a second round. Inclusion of the specific health outcomes and measures in the Standard Set required that at least 80% of the WG members voted the outcome to be very important, i.e. the outcome needed to be ranked between 7-9 points (on a 9-point Likert Scale) in each voting round. During the subsequent WG videoconferences, results of each round were presented to the WG members and the items that did not reach consensus were discussed before being presented for a final (i.e. third) vote determined by a simple yes/no vote with a 70% cut-off for inclusion.

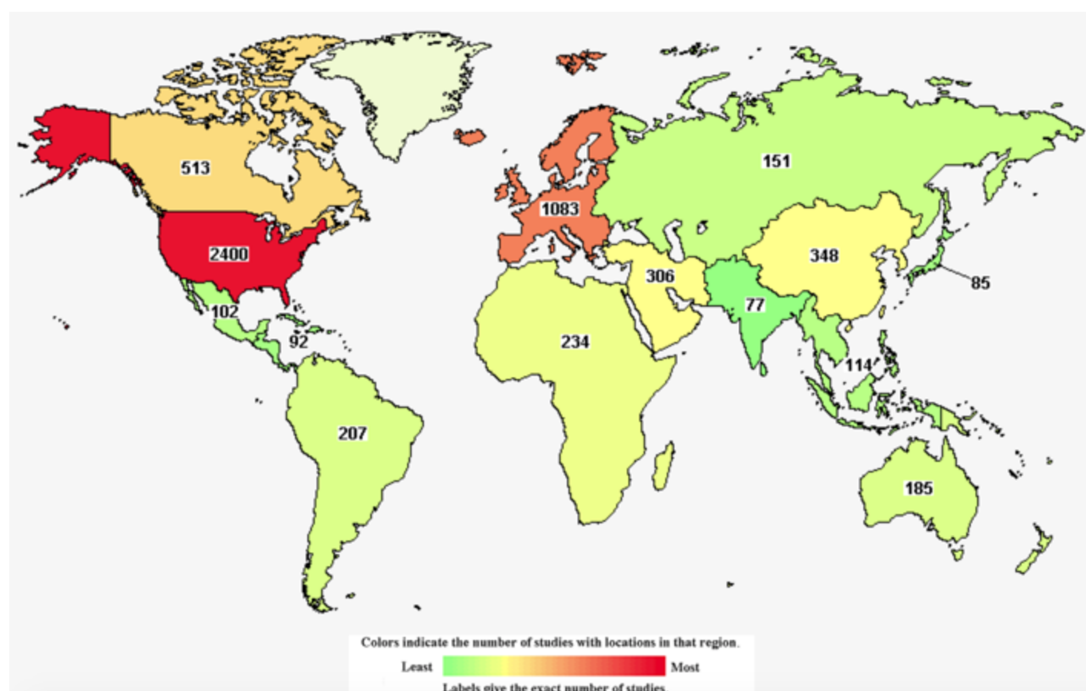

eFigure 2: Geographic overview of the scanned clinical trials, N=4345

Extracted outcomes from clinical trials on [www.clinicaltrials.gov](http://www.clinicaltrials.gov)

Search terms: pediatric OR paediatric,

Included status: recruiting, not yet recruiting, active, not recruiting, enrolling by invitation studies

Results: N=4345 clinical trials

eTable 2. Search Strategy

| Search Block        | Search terms                                                                                                                                                                                                                                                                                                                                                                                                                                                                                                                                                       | Combined with | Blocks combined with | Databases                                                                                                                                                                                                                                                                                                                                                                                |
|---------------------|--------------------------------------------------------------------------------------------------------------------------------------------------------------------------------------------------------------------------------------------------------------------------------------------------------------------------------------------------------------------------------------------------------------------------------------------------------------------------------------------------------------------------------------------------------------------|---------------|----------------------|------------------------------------------------------------------------------------------------------------------------------------------------------------------------------------------------------------------------------------------------------------------------------------------------------------------------------------------------------------------------------------------|
| Population          | child*, adolesc*, pediatric, paediatric, youth                                                                                                                                                                                                                                                                                                                                                                                                                                                                                                                     | OR            | AND                  | <ul style="list-style-type: none"><li>• Cumulative Index to Nursing and Allied Health Literature (CINAHL),</li><li>• the Education Resource Information Center (ERIC),</li><li>• PsycINFO from the American Psychological Association (APA), the United States National Library of Medicine PubMed including Medical Literature Analysis and Retrieval System Online (Medline)</li></ul> |
| Outcomes            | patient preference, instrument*, scale, measure*, patient reported outcome measures, quality of life, clinical outcome, functioning                                                                                                                                                                                                                                                                                                                                                                                                                                | OR            |                      |                                                                                                                                                                                                                                                                                                                                                                                          |
|                     | In order to receive a manageable amount of results, search terms were restricted to title and abstract from the last ten years, and limited to searches in PubMed and PsycINFO, with only reviews being extracted due to the otherwise tremendous amount of results (n=20740 and n=12751 respectively). Since reviews are expected to evaluate and summarize many existing outcome measures (including those published earlier than in the last ten years), we deem the strategy is appropriate to identify most of health outcomes that are important to measure. |               |                      |                                                                                                                                                                                                                                                                                                                                                                                          |
| Age-ranges included | Age Groups: Infant, Newborn: birth-1 month, Infant: 1-23 months, Child, Preschool: 2-5 years, Child: 6-12 years, Adolescent: 13-18 years, All Infant, All Child                                                                                                                                                                                                                                                                                                                                                                                                    |               |                      |                                                                                                                                                                                                                                                                                                                                                                                          |

eTable 3. Example of health outcomes identified by categorizing the extracted measures in accordance to the phenomenon/topic/ health outcome that they were considered to measure.

| Instruments sorted from literature scan                                                                                                                                                                                                                                                                                                                                                                                                                                                                                                                                                                                                                                                                                                                                                                                                                                                                                                                                    | Health outcomes                                                                                         |
|----------------------------------------------------------------------------------------------------------------------------------------------------------------------------------------------------------------------------------------------------------------------------------------------------------------------------------------------------------------------------------------------------------------------------------------------------------------------------------------------------------------------------------------------------------------------------------------------------------------------------------------------------------------------------------------------------------------------------------------------------------------------------------------------------------------------------------------------------------------------------------------------------------------------------------------------------------------------------|---------------------------------------------------------------------------------------------------------|
| Culture Fair Intelligence Test-Revised (CFT 20-R) (Weiss)<br>Full-Scale Intelligence Quotient (FIQ)<br>Kaufman Brief Intelligence Test, Second Edition (K-BIT 2)<br>Stanford Binet Intelligence Scales (SB5)<br>Test of Nonverbal Intelligence (TONI) (Brown et al)<br>the Kaufman Brief Intelligence Test, 2nd edition (KBIT-2)<br>Wechsler Abbreviated Scale of Intelligence (WASI)<br>Wechsler Adult Intelligence Scale-3rd Edition (WAIS-III)<br>Wechsler Intelligence Scale for Children , Fourth Edition<br>Wechsler Intelligence Test for Adults (WIE) (Aster et al)                                                                                                                                                                                                                                                                                                                                                                                                | Intelligence                                                                                            |
| Neonatal Pain, Agitation, and Sedation (N-PASS) Scale<br>Pain Assessment Scale for Preterm Infants (PASPI)<br>Pain Observation Scale for Young Children (POCIS)                                                                                                                                                                                                                                                                                                                                                                                                                                                                                                                                                                                                                                                                                                                                                                                                            | Pain                                                                                                    |
| the Movement Assessment Battery for Children-2 (MABC2)<br>Active Movement Scale<br>Movement ABC<br>Movement Assessment Battery for Children<br>Movement Disorder-Childhood Rating Scale                                                                                                                                                                                                                                                                                                                                                                                                                                                                                                                                                                                                                                                                                                                                                                                    | Movement                                                                                                |
| Peabody Developmental Motor Scales-2 (PDMS-2)<br>Battelle Developmental Inventory, Second Edition (BDI-2)<br>Bayley Scales of Infant Development (Bayley III)<br>Child development - mental rotation 3d test<br>Child development - New Reynell Developmental Scales<br>DeMoulin Self-Concept Developmental Scale for Children<br>Developmental Neuropsychological Assessment-Second Edition<br>Developmental status - Brigance Early Childhood Screen II, Ages and<br>Explore Early Development (SEED)<br>Griffiths Mental Development Scales<br>Kids' Empathic Development Scale ( KEDS)<br>National Institute of Child Health and Human Development (NICHD)<br>NSMDA (Neurological, Sensory, Motor, Developmental Assessment)<br>the Test of Gross Motor Development (TGMD)<br>Developmental Disability-Child Global Assessment Scale<br>Communication and Symbolic Behaviour Scales--Developmental Profile<br>Language - MacArthur Communicative Development Inventory | Development (including other domains as well, like mental health, self-concept, Communication, anxiety) |
| Revised Children's Manifest Anxiety Scale-Second Edition (RCMAS-2)<br>Anxiety - Spence Children's Anxiety Scale-Parent Report<br>Anxiety and Related Emotional Disorders (screen child)<br>Anxiety Disorders Interview Schedule for "DSM-IV"<br>Beck Anxiety Inventory (BAI)<br>Child Anxiety Impact Scale<br>Multidimensional Anxiety Scale for Children (MASC)                                                                                                                                                                                                                                                                                                                                                                                                                                                                                                                                                                                                           | Anxiety                                                                                                 |

In order to assure that the identified outcomes reflect a holistic perspective encompassing the physical, mental and social functioning, these outcomes were mapped to the World Health Organization’s International Classification of Functioning, Disability and Health (ICF), as a conceptual platform to capture health and health-related domains.

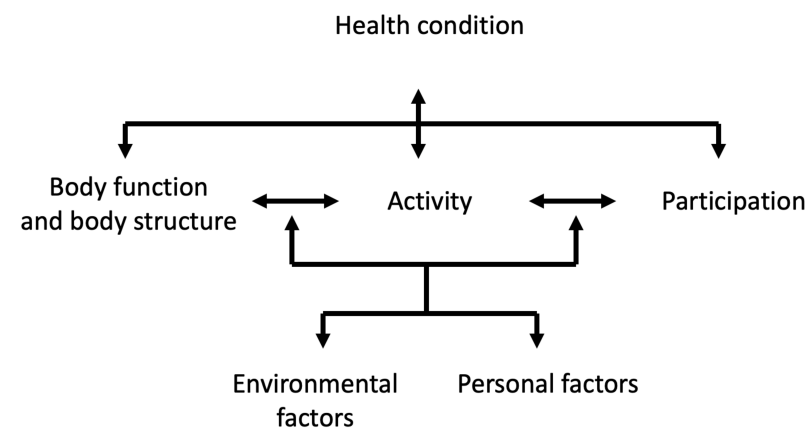

eFigure 3. The model and framework of the International Classification of Functioning, Disability and Health (ICF, World Health Organization (WHO), 2001).  
In line with the definition of health by WHO as physical, mental and social well-being and not merely the absence of disease (1946), integrates the ICF the biomedical and psycho-social perspective of health, and models health and well-being as the result of the interactions of Body Functions and Anatomical Structures with individuals’ Activities and Participation that are influenced by Environmental and Personal Factors.



eTable 4. Overview of the identified health and health-related outcomes regarding ICF Body Functions stratified by respective resource.

| ICF framework                                                                         | Health outcomes                | Instruments from literature scan | Pediatric PROMIS | Pediatric health registries and surveys | Pediatric ongoing clinical trials |
|---------------------------------------------------------------------------------------|--------------------------------|----------------------------------|------------------|-----------------------------------------|-----------------------------------|
| ICF Body Functions                                                                    |                                |                                  |                  |                                         |                                   |
| b1 Global and specific mental functions                                               | Mental + cognition             | 15                               | √                | √                                       | 114                               |
|                                                                                       | Intelligence                   | 17                               |                  |                                         | 24                                |
| b1 Temperament & personality functions                                                | Efficacy, self-esteem, mastery | 15                               |                  |                                         | 52                                |
|                                                                                       | Coping                         | 4                                |                  |                                         | 22                                |
| b1 Emotional functions                                                                | Depression                     | 17                               | √                | √                                       | 103                               |
|                                                                                       | Anxiety                        | 22                               | √                | √                                       | 152                               |
|                                                                                       | Worry, emotion mood            | 8                                |                  |                                         | 64                                |
| b1 Sleep functions                                                                    | Sleep                          | 8                                |                  |                                         | 109                               |
| b1 Energy and drive functions                                                         | Fatigue                        | 3                                | √                | √                                       | 40                                |
| b2 Sensory functions and pain                                                         | Visual/seeing                  | 1                                |                  | √                                       | 24                                |
|                                                                                       | Pain                           | 4                                | √                | √                                       | 283                               |
|                                                                                       | Hearing                        | 3                                |                  | √                                       | 22                                |
| b3 Voice and speech                                                                   | see also "Communication"       |                                  |                  | √                                       | 8                                 |
| b4 Functions of cardiovascular, haematological, immunological and respiratory systems | Blood pressure                 |                                  |                  | √                                       | 107                               |
|                                                                                       | Heart rate                     |                                  |                  |                                         | 71                                |
|                                                                                       | Breath+respiratory             | 1                                |                  |                                         | 155                               |
| b5 Functions of the digestive, metabolic and endocrine system                         | Blood glucose                  |                                  |                  | √                                       | 21                                |
| b7 Neuromuscular function (see also mobility)                                         | Motor (e.g. gross)             | 11                               | √                | √                                       | 50                                |
|                                                                                       | Fitness                        | 2                                |                  |                                         | 19                                |
|                                                                                       | Physical ability               | 1                                | √                |                                         | 0                                 |
| b8 Functions of skin and related structures                                           | Eczema                         |                                  |                  | √                                       | 16                                |

eTable 5. Overview of the frequency of identified health and health-related outcomes regarding Activities & Participation stratified by respective resource.

| ICF framework                                   | Outcomes                                                         | Instruments from literature review | Pediatric PROMIS | Pediatric <i>health</i> registries and surveys | Pediatric ongoing clinical trials |
|-------------------------------------------------|------------------------------------------------------------------|------------------------------------|------------------|------------------------------------------------|-----------------------------------|
| ICF Activities and Participation                |                                                                  |                                    |                  |                                                |                                   |
| d1 Learning and Applying knowledge              | Learning (see also intelligence, mental and cognition functions) | 2                                  |                  |                                                | 21                                |
|                                                 | Writing                                                          | 4                                  |                  |                                                | 1                                 |
|                                                 | Reading                                                          | 6                                  |                  |                                                | 14                                |
| d2 General tasks and demands                    | Stress                                                           | 12                                 | √                |                                                | 150                               |
| d3 Communication                                | Language, speech, word, conversation                             | 18                                 |                  |                                                | 51                                |
| d4 Mobility                                     | Movement (see also b7)                                           | 6                                  |                  |                                                | 34                                |
| d5 Self-care/looking after one's health         | Eating/nutrition                                                 | 2                                  |                  | √                                              | 87                                |
|                                                 | Salt intake                                                      |                                    |                  | √                                              | 0                                 |
|                                                 | Sexual health                                                    | 1                                  |                  |                                                | 14                                |
|                                                 | Substance use (e.g. alcohol, tobacco)                            | 2                                  |                  | √                                              |                                   |
|                                                 | Physical activity                                                | 1                                  | √                | √                                              | 119                               |
|                                                 | Dental hygiene                                                   |                                    |                  | √                                              | 21                                |
| d7 Interpersonal interactions and relationships | Interaction                                                      | 4                                  | √                | √                                              | 18                                |
| d8 Major life areas/engagement in play          | Engagement in play                                               | 2                                  |                  |                                                | 15                                |
|                                                 | School                                                           | 3                                  |                  | √                                              | 71                                |

eTable 6. Overview of the frequency of identified factors influencing health and health-related outcomes regarding Environmental factors stratified by respective resource

| ICF framework                     | Factors influencing outcomes | Instruments from literature scan | Pediatric PROMIS | Pediatric <i>health</i> registries and surveys | Pediatric ongoing clinical trials |
|-----------------------------------|------------------------------|----------------------------------|------------------|------------------------------------------------|-----------------------------------|
| ICF Environmental factors         |                              |                                  |                  | √                                              | 33                                |
| e3 Support                        | Support                      | 10                               |                  |                                                | 66                                |
| e4 Attitudes                      | Attitudes                    | 5                                |                  |                                                | 29                                |
| e5 Services, systems and policies | Safe neighborhoods           |                                  |                  | √                                              |                                   |

eTable 7. Overview of the frequency of identified health and health-related outcomes stratified by respective resource

|                                                  | Outcomes                                                                                                                             | Instruments from literature scan | Pediatric PROMIS      | Pediatric health registries and surveys | Pediatric ongoing clinical trials |
|--------------------------------------------------|--------------------------------------------------------------------------------------------------------------------------------------|----------------------------------|-----------------------|-----------------------------------------|-----------------------------------|
| Others                                           |                                                                                                                                      |                                  |                       |                                         |                                   |
| Overall functioning                              | Disability                                                                                                                           | 12                               |                       |                                         | 71                                |
|                                                  | Family                                                                                                                               | 21                               | √                     | √                                       | 9                                 |
|                                                  | Behavior                                                                                                                             | 34                               |                       |                                         | 213                               |
|                                                  | Participation                                                                                                                        | 8                                |                       |                                         | 31                                |
| Quality of life                                  | Quality of life, Health-related quality of life; Oral health-related quality of life; life satisfaction; well-being, health (global) | 68                               | √ (life satisfaction) | √                                       | 443                               |
| Abuse, violence                                  | Abuse, violence                                                                                                                      | 2                                |                       | √                                       | 9                                 |
| Development                                      | Developmental                                                                                                                        | 19                               |                       |                                         | 114 (growth)                      |
| Mindfulness                                      | Mindfulness                                                                                                                          | 11                               |                       |                                         | 10                                |
| Parents' substance use (alcohol, tobacco, drugs) | Parents' substance use (alcohol, tobacco, drugs)                                                                                     |                                  |                       | √                                       |                                   |
|                                                  | Parents' health                                                                                                                      |                                  |                       | √                                       |                                   |
| Anthropometric                                   |                                                                                                                                      |                                  |                       |                                         |                                   |
|                                                  | Weight                                                                                                                               |                                  |                       | √                                       | 238                               |
|                                                  | Height                                                                                                                               |                                  |                       | √                                       | 114                               |
|                                                  | Size at birth                                                                                                                        |                                  |                       | √                                       |                                   |
|                                                  | BMI                                                                                                                                  |                                  |                       |                                         | 137                               |
| Health condition                                 |                                                                                                                                      |                                  |                       |                                         |                                   |
|                                                  | Asthma                                                                                                                               | 6                                | √                     | √                                       | 114                               |
|                                                  | ADHD                                                                                                                                 | 3                                |                       |                                         | 22                                |
|                                                  | Autism                                                                                                                               | 13                               |                       |                                         | 59                                |
|                                                  | Burn                                                                                                                                 | 4                                |                       |                                         | 39                                |
|                                                  | Depression (see depression above)                                                                                                    | 17                               |                       |                                         | 34 (anxiety, bipolar, psychosis)  |
|                                                  | Diabetes                                                                                                                             | 6                                |                       |                                         | 130                               |
|                                                  | Cancer                                                                                                                               | 2                                |                       |                                         | 111                               |
|                                                  | Leukemia                                                                                                                             | 0                                |                       |                                         | 173                               |
|                                                  | Brain injuries/ cerebral palsy                                                                                                       | 4                                |                       |                                         | 87                                |
|                                                  | Mortality                                                                                                                            |                                  |                       | √                                       |                                   |
|                                                  | Morbidity                                                                                                                            |                                  |                       | √                                       |                                   |

eTable 8. ICHOM's tool selection criteria.

| Topic                                                  | Description                                                                                                                                                                                                                                                                                                                                                                       |
|--------------------------------------------------------|-----------------------------------------------------------------------------------------------------------------------------------------------------------------------------------------------------------------------------------------------------------------------------------------------------------------------------------------------------------------------------------|
| <b>Scope Alignment</b>                                 | <ul style="list-style-type: none"> <li>Exclude condition-specific tools (i.e. Breast Cancer, Low Back Pain, Dementia, etc.)</li> <li>Exclude PREMs and <i>process</i> measure tools (i.e. room cleanliness, wait times, etc.)</li> </ul>                                                                                                                                          |
| <b>Coverage of Outcomes</b>                            | <ul style="list-style-type: none"> <li>Tool must address outcomes voted for inclusion by the Working Group</li> <li>Preference given to tools which cover the most outcomes</li> </ul>                                                                                                                                                                                            |
| <b>Scientific Acceptability &amp; Clinical Utility</b> | <ul style="list-style-type: none"> <li>Tools must have demonstrated good reliability (&gt;0.7), validity, and responsiveness (sensitivity to change)</li> <li>Tools should have demonstrated clinical utility by inclusion of meaningful scores for overall health, mental health, physical health, social health</li> <li>Tools should have appropriate recall period</li> </ul> |
| <b>Patient Burden</b>                                  | <ul style="list-style-type: none"> <li>Tools should not be too long and burdensome for patients to complete</li> <li>Tools with more than 100 questions will not be considered</li> </ul>                                                                                                                                                                                         |
| <b>Language Translations</b>                           | <ul style="list-style-type: none"> <li>Tool must be available in English</li> <li>Translations should be available in several other languages</li> </ul>                                                                                                                                                                                                                          |
| <b>Implementation</b>                                  | <ul style="list-style-type: none"> <li>Tools must be able to be implement within diverse, international, clinical settings.</li> <li>Copyright &amp; Licensing – ensure fees for use of tools are not too expensive as to become a barrier to uptake/adoption of the final OPH Standard Set</li> </ul>                                                                            |

eTable 9. Example of systematic evaluation of identified measures and tools in accordance with ICHOM criteria.

| Tool                                               | Reliability<br>(≥ 0.7) | Validity | Covers OPH<br>Age Range<br>(Y/N) | Proxy (Y/N) | Self (Y/N) | Recall Period            | PRO (Y/N) | Clinical<br>Measure<br>(Y/N) | # Questions<br>in Tool | Completion<br>Time    | Copyright & Licensing Fees     |                        |                           | #<br>Languages |
|----------------------------------------------------|------------------------|----------|----------------------------------|-------------|------------|--------------------------|-----------|------------------------------|------------------------|-----------------------|--------------------------------|------------------------|---------------------------|----------------|
|                                                    |                        |          |                                  |             |            |                          |           |                              |                        |                       | Are<br>there<br>fees?<br>(Y/N) | If yes, fee<br>amount? | Criteria for<br>fee       |                |
| AQoL-8D                                            | Y (test in patients)   | Y        | Y (14+)                          | N           | Y          | 7 days                   | Y         | N                            | 35                     | 5 min                 | N                              |                        |                           | 5              |
| ITQoL                                              | N (0.5-0.7)            |          | Y (2months-5years)               | Y           | N          | past 4 weeks, in general | Y         | N                            | 97                     | 30-45mins             | N                              |                        |                           | 24             |
| ITQoL-SF47                                         | N (0.5-0.7)            | Y        | Y (2months-5years)               | Y           | N          | past 4 weeks, in general | Y         | N                            | 47                     | 30 mins               | N                              |                        |                           | 40             |
| KIDSCREEN-52                                       | Y                      | Y        | Y (8-18)                         | Y           | Y          | last week                | Y         | N                            | 52                     | 15-20 min             | N                              |                        | free after registration   | >30            |
| PROMIS Scale v1.2 - Global Health                  | Y                      | Y        | Y (18+)                          | N           | Y          | 7 days                   | Y         | N                            | 10                     | 2 min                 | N                              |                        |                           | 14             |
| PROMIS Pediatric scale- Global Health 7+2          | Y                      |          | Y (8-17)                         | N           | Y          | 7 days, in general       | Y         | N                            | 9                      | 2 min                 | N                              |                        |                           | 14             |
| PROMIS Parent Proxy Scale v1.0 - Global Health 7+2 | Y                      | Y        | Y (5-17)                         | Y           | N          | 7 days, in general       | Y         | N                            | 9                      | 2 min                 | N                              |                        |                           | 14             |
| KIDSCREEN-27                                       | Y                      | Y        | Y (8-18)                         | Y           | Y          | last week                | Y         | N                            | 27                     | 10 min                | N                              |                        | free after registration   | 35             |
| KINDL®                                             | Y                      | Y        | Y (4-16)                         | N           | Y          | last week                | Y         | N                            | 24+6, 12 for age 4-7   | 5-10min               | N                              |                        | free after registration   | 15             |
| PROMIS Pediatric Profile-25                        | Y                      | Y        | Y (8-17, 5-17 proxy)             | Y           | Y          | past 7 days              | Y         | N                            | 25                     |                       | N                              |                        |                           | 4+1            |
| Pre-School Language Scale-4                        | Y                      | Y        | Y (0-7; 11)                      | N           | N          |                          | N         | Y                            |                        | 20-45 min             | Y                              | 823 US Dollars         | Certification needed      | 4              |
| NutriSTEP                                          | Y (most questions)     | Y        | Y (18months-5y)                  | Y           | N          | 3 days                   | Y         | N                            | 17                     | < 10 min              | N                              |                        |                           | 1              |
| FLACC Behavioral Scale                             | Y                      | Y        | Y (2months-7y)                   | N           | N          |                          | N         | Y                            | 5                      | 2-5 min (observation) | N                              |                        | certification needed      | 9              |
| NIH Toolbox - Sensation - Visual Acuity Test (3+)  | Y                      | Y        | Y (3+)                           | N           | N          |                          | N         | Y                            | na                     | 3 min                 | N                              |                        | extra equipment is needed | na             |
| PROMIS Pediatric SF - Sleep Disturbance            | Y                      | Y        | Y (8-17, 5-17 proxy)             | Y           | Y          | past 7 days              | Y         | N                            | 15 (SV 4 or 8 items)   | 5-10 min              | N                              |                        |                           | 2              |

eTable 10. Example of the content-mapping of the measures to the agreed upon OPH outcomes.

| TOOLS                                    | 15D®                      | 16D®                      | 17D®                      | AQoL-8D             | ITQoL                     | ITQoL-SF47                | KIDSCREEN-52              | PROMIS Scale v1.2 - Global Health | PROMIS Pediatric scale-Global Health 7+2 |
|------------------------------------------|---------------------------|---------------------------|---------------------------|---------------------|---------------------------|---------------------------|---------------------------|-----------------------------------|------------------------------------------|
| AGE RANGES                               | (16+ yrs)                 | (12-15yrs)                | (8-11yrs)                 | (14+yrs)            | (2 mos-5 yrs)             | (2 mos-5 yrs)             | (8-18yrs)                 | (18+ yrs)                         | (8-17 yrs)                               |
| Administration Mode                      | Self/ Proxy               | Self/ Proxy               | Self/ Proxy               | Self                | Proxy                     | Proxy                     | Self/ Proxy               | Self                              | Self                                     |
| Outcomes:                                | Tool covers outcome (Y/N) | Tool covers outcome (Y/N) | Tool covers outcome (Y/N) | Tool covers outcome | Tool covers outcome (Y/N)         | Tool covers outcome (Y/N)                |
| <b><u>Mental Functioning</u></b>         |                           |                           |                           |                     |                           |                           |                           |                                   |                                          |
| Cognition: Intelligence                  | Y                         | Y                         | Y                         | N                   | Y                         | Y                         | N                         | N                                 | N                                        |
| Coping                                   | N                         | N                         | N                         | Y                   | N                         | N                         | Y                         | N                                 | N                                        |
| Mood                                     | Y                         | Y                         | Y                         | Y                   | N                         | N                         | Y                         | Y                                 | Y                                        |
| Self-efficacy                            | N                         | N                         | N                         | Y                   | N                         | N                         | Y                         | N                                 | N                                        |
| Self-esteem                              | N                         | N                         | N                         | Y                   | N                         | N                         | N                         | N                                 | N                                        |
| Mental Health                            | Y                         | Y                         | Y                         | Y                   | Y                         | Y                         | Y                         | Y                                 | Y                                        |
| <b><u>Social/General Functioning</u></b> |                           |                           |                           |                     |                           |                           |                           |                                   |                                          |
| Communication                            | Y                         | Y                         | Y                         | N                   | Y                         | Y                         | N                         | N                                 | N                                        |
| School Attendance                        | N                         | N                         | N                         | N                   | N                         | N                         | Y                         | N                                 | N                                        |
| Functioning                              | Y                         | Y                         | Y                         | Y                   | N                         | N                         | Y                         | Y                                 | Y                                        |
| Development                              | N                         | N                         | N                         | N                   | Y                         | Y                         | N                         | N                                 | N                                        |
| HRQoL                                    | Y                         | Y                         | Y                         | Y                   | Y                         | Y                         | Y                         | Y                                 | Y                                        |
| <b><u>Physical Functioning</u></b>       |                           |                           |                           |                     |                           |                           |                           |                                   |                                          |
| Survival                                 | ICHOM                     | ICHOM                     | ICHOM                     | ICHOM               | ICHOM                     | ICHOM                     | ICHOM                     | ICHOM                             | ICHOM                                    |
| Hearing                                  | Y                         | Y                         | Y                         | N/A                 | N                         | N                         | N                         | N                                 | N                                        |
| Vision                                   | Y                         | Y                         | Y                         | N/A                 | N                         | N                         | N                         | N                                 | N                                        |
| Eating                                   | Y                         | Y                         | Y                         | N                   | Y                         | Y                         | N                         | N                                 | N                                        |
| Nutrition                                | N                         | N                         | N                         | N                   | N                         | N                         | N                         | N                                 | N                                        |
| Growth                                   | N                         | N                         | N                         | N                   | Y                         | Y                         | N                         | N                                 | N                                        |
| Physical ability: mobility               | Y                         | Y                         | Y                         | Y                   | Y                         | Y                         | Y                         | Y                                 | Y                                        |
| Fitness                                  | Y                         | Y                         | Y                         | N                   | N                         | N                         | N                         | Y                                 | Y                                        |
| Pain-free                                | Y                         | Y                         | Y                         | Y                   | Y                         | Y                         | Y                         | Y                                 | Y                                        |
| Sleep                                    | Y                         | Y                         | Y                         | N                   | N                         | N                         | N                         | Y                                 | Y                                        |
| Sexual Health                            | Y                         | N                         | N                         | N                   | N                         | N                         | N                         | N                                 | N                                        |
| <b># Outcomes Covered By Tool:</b>       | <b>14</b>                 | <b>13</b>                 | <b>13</b>                 | <b>9</b>            | <b>9</b>                  | <b>9</b>                  | <b>9</b>                  | <b>8</b>                          | <b>8</b>                                 |
|                                          | <b>M</b>                  | <b>M</b>                  | <b>M</b>                  | <b>M</b>            | <b>M</b>                  | <b>M</b>                  | <b>M</b>                  | <b>M</b>                          | <b>M</b>                                 |

eTable 11. Example of tool package 1 for age-range birth to 5 years

| <b>Recommendation 1 (Birth - 5 yrs)</b> <div>           ➤ Total Outcomes Covered: <b>12</b><br/>           ➤ Total # of Questions: <b>20-39</b><br/>           ➤ Total time to completion: <b>30-41 mins</b> </div> |                                   |                                                                                                                       |                           |                |                |           |
|---------------------------------------------------------------------------------------------------------------------------------------------------------------------------------------------------------------------|-----------------------------------|-----------------------------------------------------------------------------------------------------------------------|---------------------------|----------------|----------------|-----------|
| Tool                                                                                                                                                                                                                | All Psychometric Properties (Y/N) | Outcomes Covered (#)                                                                                                  | Time to completion (mins) | # of Questions | # of Languages | Fee (Y/N) |
| CDC Milestone Checklist                                                                                                                                                                                             | N/A                               | Cognition: Intelligence, Mood, Mental Health, Functioning, Development, Communication, Physical Ability: Mobility (7) | 10 - 15                   | 10-29          | 2              | N         |
| NIH Toolbox - Sensation - Visual Acuity Test (3+) [Equipment Needed]                                                                                                                                                | Clinical Measure                  | Vision (1)                                                                                                            | 3                         | -              | 1              | N         |
| WHO Growth Charts Early Yrs [Trained Admin]                                                                                                                                                                         | Clinical Measure                  | Growth, Nutrition (2)                                                                                                 | 15 - 20                   | 6              | 1              | N         |
| School Attendance                                                                                                                                                                                                   | -                                 | School Attendance (1)                                                                                                 | 1                         | 1              | -              | N         |
| ICHOM Standard Measure                                                                                                                                                                                              | -                                 | Survival (1)                                                                                                          | 1 - 2                     | 3              | -              | N         |

eTable 12. Example of tool package 2 for age-range birth to 5 years

| <b>Recommendation 2 (Birth - 5 yrs)</b> <div>           ➤ Total Outcomes Covered: <b>14</b><br/>           ➤ Total # of Questions: <b>57</b><br/>           ➤ Total time to completion: <b>45 - 56 mins</b> </div> |                                   |                                                                                                                                       |                           |                |                |           |
|--------------------------------------------------------------------------------------------------------------------------------------------------------------------------------------------------------------------|-----------------------------------|---------------------------------------------------------------------------------------------------------------------------------------|---------------------------|----------------|----------------|-----------|
| Tool                                                                                                                                                                                                               | All Psychometric Properties (Y/N) | Outcomes Covered (#)                                                                                                                  | Time to completion (mins) | # of Questions | # of Languages | Fee (Y/N) |
| ITQoL                                                                                                                                                                                                              | Y                                 | Cognition: Intelligence, Mental Health, Communication, Development, HRQoL, Eating, Growth, Physical Ability: Mobility, Pain-free. (9) | 25-30                     | 47             | 40             | N         |
| NIH Toolbox - Sensation - Visual Acuity Test (3+) [Equipment Needed]                                                                                                                                               | Clinical Measure                  | Vision (1)                                                                                                                            | 3                         | -              | 1              | N         |
| WHO Growth Charts Early Yrs [Trained Admin]                                                                                                                                                                        | Clinical Measure                  | Growth, Nutrition (2)                                                                                                                 | 15 - 20                   | 6              | 1              | N         |
| School Attendance                                                                                                                                                                                                  | -                                 | School Attendance (1)                                                                                                                 | 1                         | 1              | -              | N         |
| ICHOM Standard Measure                                                                                                                                                                                             | -                                 | Survival (1)                                                                                                                          | 1 - 2                     | 3              | -              | N         |



eTable 13. Overview of the identified case-mix variables following the search for outcome measures.

| Case-Mix                                            | Type        | Response option 1                                                                                                                                                                                                                                                                                                                                                   | Response option 2                                                                                 |
|-----------------------------------------------------|-------------|---------------------------------------------------------------------------------------------------------------------------------------------------------------------------------------------------------------------------------------------------------------------------------------------------------------------------------------------------------------------|---------------------------------------------------------------------------------------------------|
| Age                                                 | Demographic | years since birth                                                                                                                                                                                                                                                                                                                                                   |                                                                                                   |
| Gender                                              | Demographic | male, female, others                                                                                                                                                                                                                                                                                                                                                |                                                                                                   |
| Diagnose                                            | Clinical    | ICD-code                                                                                                                                                                                                                                                                                                                                                            |                                                                                                   |
| Race                                                | Demographic |                                                                                                                                                                                                                                                                                                                                                                     |                                                                                                   |
| Treatment/surgical procedure                        | Treatment   |                                                                                                                                                                                                                                                                                                                                                                     |                                                                                                   |
| Parent income                                       | Demographic | amount of salary                                                                                                                                                                                                                                                                                                                                                    |                                                                                                   |
| Ethnicity                                           | Demographic |                                                                                                                                                                                                                                                                                                                                                                     |                                                                                                   |
| Parent occupation/employment                        | Demographic | full time, part time, unemployed, home, retired, student, other                                                                                                                                                                                                                                                                                                     |                                                                                                   |
| Relationship                                        | Demographic | Mother; father; other                                                                                                                                                                                                                                                                                                                                               | parents, sibling, other relative, non-relative, missing, adolescent/young adult with a disability |
| Marital status                                      | Demographic | married/de facto, single/never married, single/widowed, single/divorced                                                                                                                                                                                                                                                                                             |                                                                                                   |
| Parent education                                    | Demographic | primary, high school, trade, university, other                                                                                                                                                                                                                                                                                                                      | high school, graduated high school, some postsecondary, graduated postsecondary                   |
| Disability                                          | Clinical    |                                                                                                                                                                                                                                                                                                                                                                     |                                                                                                   |
| Diagnose/disability severity                        | Clinical    |                                                                                                                                                                                                                                                                                                                                                                     |                                                                                                   |
| Migration                                           | Demographic |                                                                                                                                                                                                                                                                                                                                                                     |                                                                                                   |
| Socioeconomic status                                | Demographic | ""The Family Affluence Scale (FAS), a socioeconomic indicator to be filled in by children, includes family car ownership, having own unshared room, the number of computers at home, and times the child spent on holidays in the past 12 months. The cross-cultural validity of the FAS has been shown in multinational surveys across 27 and 35 countries [27]."" |                                                                                                   |
| Public health insurance                             | Demographic | yes/no                                                                                                                                                                                                                                                                                                                                                              |                                                                                                   |
| Premature birth                                     | Clinical    |                                                                                                                                                                                                                                                                                                                                                                     |                                                                                                   |
| Postoperative analgesia / pharmacological influence | Treatment   |                                                                                                                                                                                                                                                                                                                                                                     |                                                                                                   |
| Neighbourhood                                       | Demographic | Large city or metropolitan area (greater than 200000), urbanized area (between 50 000 and 200 000), town or small city (between 2500 and 50000), rural area or town (less than 500),                                                                                                                                                                                |                                                                                                   |
| Parents age at child birth                          | Demographic |                                                                                                                                                                                                                                                                                                                                                                     |                                                                                                   |
| Social class                                        | Demographic | low, middle, high                                                                                                                                                                                                                                                                                                                                                   |                                                                                                   |
| Parent-reported chronic conditions of child         | Demographic |                                                                                                                                                                                                                                                                                                                                                                     |                                                                                                   |
| Parent-reported medical consumption                 | Demographic | with a low and a high parent-reported medical consumption                                                                                                                                                                                                                                                                                                           |                                                                                                   |
| Years since diagnosis                               | Clinical    |                                                                                                                                                                                                                                                                                                                                                                     |                                                                                                   |
| Spasticity                                          | Clinical    |                                                                                                                                                                                                                                                                                                                                                                     |                                                                                                   |
| Treatment modality                                  | Treatment   |                                                                                                                                                                                                                                                                                                                                                                     |                                                                                                   |

eTable 14. Sampling strategy for patient validation survey.

| Country        | Institutional review board (IRB) exemption review                                                             |
|----------------|---------------------------------------------------------------------------------------------------------------|
| United States  | Advarra Institutional Review Board (Pro00038212)                                                              |
| Colombia*      | Ethics Committee for Clinical Research in Colombia (Comité de Ética en Investigación Clínica, CEIC-4187-2019) |
| Singapore*     | The survey was carried out as a quality improvement initiative not needing IRB approval                       |
| United Kingdom | Patient Validation was exempt as it did not qualify as research needing ethical approval                      |

A convenience sample of parents and caregivers of children and adolescents in Colombia, Singapore, the United States, and the United Kingdom were asked to validate the outcomes that reached consensus based on the Delphi-process. These four countries were chosen based on their ability to obtain an institutional review board (IRB) exemption review in a timely fashion. In the United States, the ethics and institutional review board (IRB) exemption for the survey was carried out by Advarra Institutional Review Board (Pro00038212) and in Colombia by the Ethics Committee for Clinical Research in Colombia (Comité de Ética en Investigación Clínica, CEIC-4187-2019). In Singapore, the survey was carried out as a quality improvement initiative not needing IRB approval. In the United Kingdom, the Patient Validation was also exempt as it did not qualify as research needing ethical approval. Between November 2019 and January 2020, an electronic survey was sent asking participants to rank the importance of these outcomes using a 9-point Likert Scale with an opportunity to give additional free text comments.

\*Participants included parents and caregivers of children receiving pediatric care and surveys were administered while their child waited to receive care.

eTable 15. Overview of Patient Validation Survey respondent characteristics, N=270

|                                                    | n   | %  |
|----------------------------------------------------|-----|----|
| Country                                            |     |    |
| Colombia                                           | 86  | 32 |
| Singapore                                          | 161 | 59 |
| United Kingdom                                     | 5   | 2  |
| United States of America                           | 18  | 7  |
| Number of children                                 |     |    |
| 1                                                  | 111 | 41 |
| 2                                                  | 97  | 36 |
| 3                                                  | 46  | 17 |
| 4                                                  | 5   | 2  |
| ≥ 5                                                | 3   | 1  |
| Sex of children                                    |     |    |
| Male                                               | 92  | 34 |
| Female                                             | 84  | 31 |
| Male and Female                                    | 89  | 33 |
| Age-range of children                              |     |    |
| 0-5 years                                          | 143 | 53 |
| 6-7 years                                          | 51  | 19 |
| 8-12 years                                         | 105 | 39 |
| 13-17 years                                        | 51  | 19 |
| 18-24 years                                        | 35  | 13 |
| Number of healthcare appointments in the last year |     |    |
| 0                                                  | 11  | 4  |
| 1-4                                                | 149 | 55 |
| 5-9                                                | 78  | 29 |
| ≥ 10                                               | 32  | 12 |
| Satisfied with child's healthcare (range 1-5)      |     |    |
| Unsatisfied (1)                                    | 3   | 1  |
| Somewhat satisfied (2-3)                           | 59  | 22 |
| Completely satisfied (4-5)                         | 208 | 77 |

eTable 16. Overview of characteristics of the healthcare providers that participated in the professionals open review, N=51

|                           | n  | %  |
|---------------------------|----|----|
| Country                   |    |    |
| Argentina                 | 1  | 2  |
| Australia                 | 2  | 4  |
| Brazil                    | 2  | 4  |
| Canada                    | 1  | 2  |
| Colombia                  | 2  | 4  |
| Malaysia                  | 1  | 2  |
| Netherlands               | 6  | 12 |
| Portugal                  | 1  | 2  |
| Singapore                 | 7  | 14 |
| Spain                     | 18 | 35 |
| Sweden                    | 1  | 2  |
| United Arab Emirates      | 1  | 2  |
| United Kingdom            | 2  | 4  |
| United States of America  | 6  | 12 |
| Profession                |    |    |
| Physician                 | 37 | 72 |
| Nurse                     | 3  | 6  |
| Healthcare Administration | 7  | 14 |
| Researcher                | 1  | 2  |
| Policy Advisor            | 2  | 4  |
| Other                     | 1  | 2  |
